# Supplementary material for: Genomic and Clinical Effects Associated with a Relaxation Response Mind-Body Intervention in Patients with Irritable Bowel Syndrome and Inflammatory Bowel Disease
Source: PubMed Central journal article supplement (PMC4415769; doi:10.1371/journal.pone.0123861), 2015-04-30

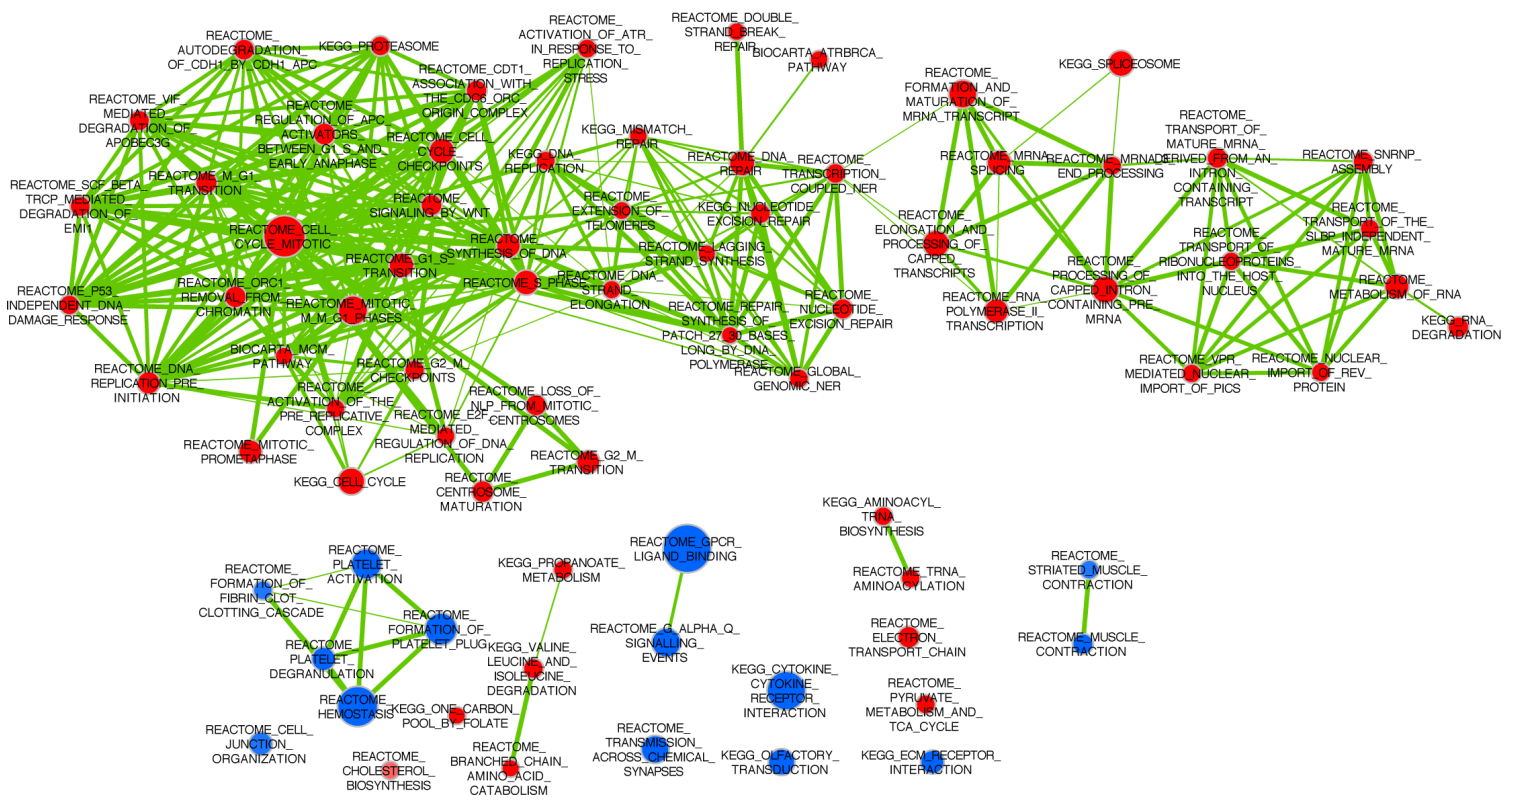

Supplement: pone.0123861.s003.pdf [file pone.0123861.s003.pdf]
